# Supplementary material for: Beneficial effects of procyanidin B2 on adriamycin-induced nephrotic syndrome mice: the multi-action mechanism for ameliorating glomerular permselectivity injury
Source: Royal Society of Chemistry journal article supplement (doi:10.1039/d1fo03616e), 2022-01-01
Supplement: d1fo03616e1.pdf [file d1fo03616e1.pdf]

Supplementary Materials for

**Beneficial effects of Procyanidin B2 on adriamycin-induced nephrotic syndrome mice: the multi-action mechanism for ameliorating glomerular permselectivity injury**

Chuanping Zhao<sup>1</sup>, Jiamei Tang<sup>1</sup>, Xiaoya Li<sup>1</sup>, Zihan Yan<sup>1</sup>, Liangliang Zhao<sup>2</sup>,  
Wenbo Lang<sup>2</sup>, Chunmao Yuan<sup>3</sup>, Chengyan Zhou<sup>1\*, 3</sup>

1. Key Laboratory of Pharmaceutical Quality Control of Hebei Province, College of Pharmaceutical Sciences, Institute of Life Science and Green Development, Hebei University, 180 WuSi Road, Lianchi District, Baoding, 071002, China.

2. Department of Monitoring and Analysis, Baoding Environmental Monitoring Center of Hebei Province, 224 Dongfeng Road, Lianchi District, Baoding, 071000, China.

3. State Key Laboratory of Functions and Applications of Medicinal Plants, Guizhou Medical University, Guiyang 550014, China.

\*Corresponding author at: Chengyan, Zhou, Key Laboratory of Pharmaceutical Quality Control of Hebei Province, College of Pharmaceutical Sciences, Institute of Life Science and Green Development, Hebei University, 180 WuSi Road, Lianchi District, Baoding, 071002, China. E-mail: xuefanone@163.com.

Tel/Fax: +86 312 5971107; E-mail address: xuefanone@163.com (C.Y. Zhou).

## Table of contents

|                                                                                                                                                                                 |    |
|---------------------------------------------------------------------------------------------------------------------------------------------------------------------------------|----|
| Supplementary Materials and Methods .....                                                                                                                                       | 3  |
| 2.3 Biochemical parameters analysis.....                                                                                                                                        | 3  |
| Table S1. The equation and the correlation coefficient of serum and renal FFAs. ....                                                                                            | 5  |
| Table S2. Names, characteristic fragment ions and retention times of all 32 fatty acid methyl esters in the method. ....                                                        | 7  |
| Table S3. The equation and the correlation coefficient of metallic elements in serum and urine. ....                                                                            | 8  |
| Table S4. Effect of PB2 on organs relative weights in ADR mice.....                                                                                                             | 10 |
| Table S5. Effect of PB2 on renal function in serum of ADR mice. ....                                                                                                            | 11 |
| Table S6. Effects of PB2 on serum SOD, NO, iNOS, ROS, MDA, GSH, CAT and GPx in ADR mice (fifth week). ....                                                                      | 12 |
| Table S7. Effects of PB2 on serum TNF- $\alpha$ , NF- $\kappa$ B, IL-1 $\beta$ , IFN $\gamma$ , IL-6, IL-17, MCP-1 and IL-5, Hsp90 in ADR mice (fifth week).....                | 13 |
| Table S8. Effect of PB2 on liver function in ADR mice .....                                                                                                                     | 14 |
| Figure S1. Effects of PB2 on general conditions of ADR-induced NS mice. ....                                                                                                    | 15 |
| Figure S2. The general observation of kidney in each group at different periods.....                                                                                            | 16 |
| Figure S3. The kidney sections were stained with haematoxylin and eosin (H&E) to demonstrate the histopathological morphology at 2 and 4 weeks. ....                            | 17 |
| Figure S4. The effects of PB2 on renal inflammation. ....                                                                                                                       | 18 |
| Figure S5. The statistical study of correlation between serum and renal levels of TNF- $\alpha$ and IL-6. ....                                                                  | 19 |
| Figure S6. The mRNA expressions of mTOR(A), Bax(B), Bcl-2(C), Akt(D) and PI3K(E) in kidney were evaluated by qRT-PCR analysis. ....                                             | 20 |
| Figure S7. Effects of PB2 on lipid dysmetabolism.....                                                                                                                           | 21 |
| Figure S8. The liver sections were stained with haematoxylin and eosin (H&E) to demonstrate the histopathological morphology (100 $\times$ , 400 $\times$ ) at fifth week ..... | 22 |
| Figure S9. The QC of PCA and PLS-DA. ....                                                                                                                                       | 23 |
| Figure S10. PLS-DA score plots model of elements derived from the serum and urine of mice .....                                                                                 | 24 |
| Figure S11. The result on permutation test of OPLS-DA model and VIP plot of NC group vs ADR group.....                                                                          | 25 |

## Supplementary Materials and Methods

### 2.3 Biochemical parameters analysis

The serum concentrations of creatinine (Cr, cat#.C011-2-1), uric acid (UA, cat#.C012-2-1), blood urea nitrogen (BUN, cat#.C013-1-1), albumin (ALB, cat#.A028-2-1), and total protein (TP, cat#. A045-4-2) were detected by using relevant assay kits. The concentrations of alanine aminotransferase (ALT, cat#.C009-2-1), aspartate aminotransferase (AST, cat#.C010-2-1), alkaline phosphatase (ALP, cat#.A059-2-2), total bilirubin (TBIL, cat#.C019-1-1), and direct bilirubin (DBIL, cat#.C019-2-1) were assessed by using relevant commercial assay kits. The activities of total superoxide dismutase (T-SOD, cat#.A001-1, Hydroxylamine method), catalase (CAT, cat#.A007-1-1, Visible light method), and glutathione peroxidase (GPx, cat#.A005-1-2) in kidney and serum were detected by using relevant activity assay kits. The amount of malonaldehyde (MDA, cat#. A003-1, TBA method) and Nitric Oxide (NO, cat#. A013-2-1, Microwell plate method) were measured by relevant commercial assay kits. All of the aforementioned kits were purchased from Nanjing Jiancheng Bioengineering Institute (Nanjing, China). The urinary levels of UP (cat#.C035-21) was measured by using urine protein test kit (CBB method). The serum levels of arginine vasopressin (AVP, cat#.H353-1) were detected by using ELISA kit (Nanjing Jiancheng Bioengineering Institute, Nanjing, China). The formations of aldosterone (ALD, cat#.MB-3273B), cysteine proteinase inhibitor (Cys-C, cat#.MB-5786b) in serum were measured by using ELISA kits (Jiangsu Mei Biao Biological Technology Co., Ltd, Jiangsu, China). In addition, the examinations of reactive oxygen species (ROS, cat#.MB5886A), inducible nitric oxide synthase (iNOS, cat#.MB3190A), reduced glutathione (GSH, cat#.MB-5614B), and oxidized glutathione (GSSG, cat#.MB5614B) in serum and kidney, were performed by using enzyme-linked immunosorbent(ELISA) assay kits (Jiangsu Mei Biao Biological Technology Co., Ltd, Jiangsu, China). The levels of total cholesterol (T-CHO, cat#.A111-1-1, COD-PAP method), triglyceride (TG, cat#.A110-1-1, GPO-PAP method), high-density lipoprotein cholesterol (HDL-C, cat#.A112-1-1), and low-density lipoprotein cholesterol (LDL-C, cat#.A113-1-1) in serum, kidney, and liver,

were detected by using relevant commercial assay kits, which were obtained from Nanjing Jiancheng Bioengineering Institute (Nanjing, China). The activity of lipoprotein lipase (LPL, cat#A067-1-2) in kidney were evaluated by using activity assay kit (Nanjing Jiancheng Bioengineering Institute, Nanjing, China). The levels of ATP-binding cassette transporter A1(ABCA1, cat#.YJ6c5782), ATP-binding cassette sub-family G member 1 (ABCG1, cat#.YJ79920), and Apolipoprotein CIII(APOCIII, cat#.YJ89877) in kidney, were assessed by using ELISA kits (Shanghai Enzyme-linked Biotechnology Co., Ltd., Shanghai, China). The serum and renal levels of tumor necrosis factor alpha (TNF- $\alpha$ , cat#.MB-2868A), interferon gamma (IFN $\gamma$ , cat#.MB-1739A), monocyte chemoattractant protein-1 (MCP-1, cat#.MB-2818A), heat shock protein 90 (Hsp90, cat#.MB-3193B), interleukin-1 beta (IL-1 $\beta$ , CAT#.MB-2776A), interleukin-6 (IL-6, cat#.MB-1731A), interleukin-17 (IL-17, cat#.MB-1629A), interleukin-5 (IL-5, cat#. MB-1635B), and nuclear transcription factor (NF- $\kappa$ B, cat#.MB-5996B) in serum and kidney, were detected by ELISA kits (Jiangsu Mei Biao Biological Technology Co., Ltd, Jiangsu, China). All the tests were performed under the instructions of the manufacture's protocols. Besides, the urinary and serum levels of Na were detected by using a NexION 1000 series inductively coupled plasma-mass spectrometry (ICP-MS, PerkinElmer, Inc., USA).

**Table S1. The equation and the correlation coefficient of serum and renal FFAs.**

| ample | FFAs | Calibration equation | Regression coefficient |
|-------|------|----------------------|------------------------|
|-------|------|----------------------|------------------------|

|               |                       |                            |           |
|---------------|-----------------------|----------------------------|-----------|
|               | <b>C4:0</b>           | $Y = 231.9886X + 1142.191$ | 0.999168  |
|               | <b>C6:0</b>           | $Y = 796.7527X + 22471.84$ | 0.99971   |
|               | <b>C8:0</b>           | $Y = 1093.199X + 30765.63$ | 0.999694  |
|               | <b>C10:0</b>          | $Y = 1121.834X + 38191.65$ | 0.999074  |
|               | <b>C11:0</b>          | $Y = 1106.051X + 35247.64$ | 0.999255  |
|               | <b>C12:0</b>          | $Y = 1098.118X + 36021.14$ | 0.999095  |
|               | <b>C13:0</b>          | $Y = 1067.652X + 31197.79$ | 0.999042  |
|               | <b>C14:1</b>          | $Y = 339.8378X + 5697.646$ | 0.999528  |
|               | <b>C14:0</b>          | $Y = 1047.131X + 27457.05$ | 0.999676  |
|               | <b>C15:1</b>          | $Y = 363.9882X + 8475.023$ | 0.999787  |
|               | <b>C15:0</b>          | $Y = 1010.994X + 26165.28$ | 0.999637  |
|               | <b>C16:1</b>          | $Y = 173.2855X + 5979.741$ | 0.999619  |
|               | <b>C16:0</b>          | $Y = 1850.866X + 64132.3$  | 0.999267  |
|               | <b>C17:1</b>          | $Y = 298.9931X + 6166.99$  | 0.999827  |
|               | <b>C17:0</b>          | $Y = 920.7525X + 24140.94$ | 0.999484  |
|               | <b>C18:3n-6</b>       | $Y = 285.2137X + 6128.049$ | 0.999604  |
| <b>Serum</b>  | <b>C18:2n-6-cis</b>   | $Y = 191.3951X + 8162.53$  | 0.999394  |
|               | <b>C18:1n-9-trans</b> | $Y = 37.35334X + 1032.889$ | 0.999122  |
|               | <b>C18:0</b>          | $Y = 856.7376X + 30753.11$ | 0.99902   |
|               | <b>C20:4n-6</b>       | $Y = 110.8932X + 5167.82$  | 0.999223  |
|               | <b>C20:5n</b>         | $Y = 307.5555X + 1190.807$ | 0.999925  |
|               | <b>C20:3n-6</b>       | $Y = 284.2601X + 5980.675$ | 0.99962   |
|               | <b>C20:2n-6</b>       | $Y = 47.86521X + 3778.084$ | 0.999159  |
|               | <b>C20:1n-9cis</b>    | $Y = 274.3791X + 1243.754$ | 0.999358  |
|               | <b>C20:0</b>          | $Y = 792.1656X + 11811.08$ | 0.999832  |
|               | <b>C21:0</b>          | $Y = 714.0643X + 2311.524$ | 0.99994   |
|               | <b>C22:6n-3</b>       | $Y = 262.3222X - 1966.042$ | 0.999851  |
|               | <b>C22:2n-6</b>       | $Y = 291.7868X + 766.1795$ | 0.9999986 |
|               | <b>C22:0</b>          | $Y = 695.5308X - 856.9354$ | 0.999921  |
|               | <b>C23:0</b>          | $Y = 651.3777X - 8646.585$ | 0.999663  |
|               | <b>C24:1</b>          | $Y = 207.3918X + 474.0115$ | 0.99976   |
|               | <b>C24:0</b>          | $Y = 562.3829X - 10564.72$ | 0.999351  |
|               | <b>C4:0</b>           | $Y = 231.9886X + 1142.191$ | 0.999168  |
|               | <b>C6:0</b>           | $Y = 796.7527X + 22471.84$ | 0.99971   |
|               | <b>C8:0</b>           | $Y = 1093.199X + 30765.63$ | 0.999694  |
|               | <b>C10:0</b>          | $Y = 1121.834X + 38191.65$ | 0.999074  |
|               | <b>C11:0</b>          | $Y = 1106.051X + 35247.64$ | 0.999255  |
| <b>kidney</b> | <b>C12:0</b>          | $Y = 1098.118X + 36021.14$ | 0.999095  |
|               | <b>C13:0</b>          | $Y = 1067.652X + 31197.79$ | 0.999042  |
|               | <b>C14:1</b>          | $Y = 339.8378X + 5697.646$ | 0.999528  |
|               | <b>C14:0</b>          | $Y = 1047.131X + 27457.05$ | 0.999676  |
|               | <b>C15:1</b>          | $Y = 363.9882X + 8475.023$ | 0.999787  |
|               | <b>C15:0</b>          | $Y = 1010.994X + 26165.28$ | 0.999637  |
|               | <b>C16:1</b>          | $Y = 173.2855X + 5979.741$ | 0.999619  |

---

|                       |                          |           |
|-----------------------|--------------------------|-----------|
| <b>C16:0</b>          | Y = 1850.866X + 64132.3  | 0.999267  |
| <b>C17:1</b>          | Y = 298.9931X + 6166.99  | 0.999827  |
| <b>C17:0</b>          | Y = 920.7525X + 24140.94 | 0.999484  |
| <b>C18:3n-6</b>       | Y = 285.2137X + 6128.049 | 0.999604  |
| <b>C18:2n-6-cis</b>   | Y = 191.3951X + 8162.53  | 0.999394  |
| <b>C18:1n-9-trans</b> | Y = 37.35334X + 1032.889 | 0.999122  |
| <b>C18:0</b>          | Y = 856.7376X + 30753.11 | 0.99902   |
| <b>C20:4n-6</b>       | Y = 110.8932X + 5167.82  | 0.999223  |
| <b>C20:5n</b>         | Y = 307.5555X + 1190.807 | 0.999925  |
| <b>C20:3n-6</b>       | Y = 284.2601X + 5980.675 | 0.99962   |
| <b>C20:2n-6</b>       | Y = 47.86521X + 3778.084 | 0.999159  |
| <b>C20:1n-9cis</b>    | Y = 274.3791X + 1243.754 | 0.999358  |
| <b>C20:0</b>          | Y = 792.1656X + 11811.08 | 0.999832  |
| <b>C21:0</b>          | Y = 714.0643X + 2311.524 | 0.99994   |
| <b>C22:6n-3</b>       | Y = 262.3222X - 1966.042 | 0.999851  |
| <b>C22:2n-6</b>       | Y = 291.7868X + 766.1795 | 0.9999986 |
| <b>C22:0</b>          | Y = 695.5308X - 856.9354 | 0.999921  |
| <b>C23:0</b>          | Y = 651.3777X - 8646.585 | 0.999663  |
| <b>C24:1</b>          | Y = 207.3918X + 474.0115 | 0.99976   |
| <b>C24:0</b>          | Y = 562.3829X - 10564.72 | 0.999351  |

---

\*X: the quality of fatty acids; Y: peak area of fatty acid.

**Table S2. Names, characteristic fragment ions and retention times of all 32 fatty acid methyl esters in the method.**

| Abbreviation          | (Methyl)-name                       | MW  | Fragment ions (m/z) |     |     | Rt (min) |
|-----------------------|-------------------------------------|-----|---------------------|-----|-----|----------|
| <b>C4:0</b>           | Butyrate                            | 102 | 43                  | 71  | 74  | 3.885    |
| <b>C6:0</b>           | Hexanoate                           | 130 | 74                  | 43  | 87  | 8.840    |
| <b>C8:0</b>           | Octanoate                           | 158 | 74                  | 43  | 87  | 12.575   |
| <b>C10:0</b>          | Decanoate                           | 186 | 74                  | 43  | 87  | 18.365   |
| <b>C11:0</b>          | Undecanoate                         | 200 | 74                  | 43  | 87  | 21.925   |
| <b>C12:0</b>          | Dodecanoate                         | 214 | 74                  | 43  | 87  | 25.675   |
| <b>C13:0</b>          | Tridecanoate                        | 228 | 74                  | 43  | 87  | 29.450   |
| <b>C14:1</b>          | 9Z-Tetradecenoate                   | 240 | 55                  | 74  | 41  | 32.695   |
| <b>C14:0</b>          | Tetradecanoate                      | 242 | 74                  | 87  | 43  | 33.155   |
| <b>C15:1</b>          | 10Z-Pentadecenoate                  | 254 | 55                  | 71  | 41  | 36.310   |
| <b>C15:0</b>          | Pentadecanoate                      | 256 | 74                  | 87  | 43  | 36.750   |
| <b>C16:1</b>          | 9Z-Hexadecenoate                    | 268 | 55                  | 69  | 41  | 39.485   |
| <b>C16:0</b>          | Hexadecanoate                       | 270 | 74                  | 87  | 43  | 40.210   |
| <b>C17:1</b>          | 10Z-Heptadecenoate                  | 282 | 55                  | 69  | 41  | 42.895   |
| <b>C17:0</b>          | Heptadecanoate                      | 284 | 74                  | 87  | 43  | 43.690   |
| <b>C18:3n-6</b>       | 6Z,9Z,12Z-Octadecatrienoate         | 292 | 67                  | 79  | 41  | 45.520   |
| <b>C18:2n-6-cis</b>   | 9Z,12Z-Octadecadienoate             | 294 | 67                  | 81  | 95  | 46.040   |
| <b>C18:1n-9-trans</b> | 9E-Octadecenoate                    | 296 | 264                 | 109 | 222 | 46.460   |
| <b>C18:0</b>          | Octadecanoate                       | 298 | 74                  | 87  | 43  | 47.050   |
| <b>C20:4n-6</b>       | 5Z,8Z,11Z,14Z-Eicosatetraenoate     | 318 | 79                  | 91  | 67  | 50.575   |
| <b>C20:5n</b>         | 5Z,8Z,11Z,14Z,17Z-Eicosapentaenoate | 316 | 79                  | 91  | 67  | 50.740   |
| <b>C20:3n-6</b>       | 8Z,11Z,14Z-Eicosatrienoate          | 320 | 67                  | 79  | 93  | 51.010   |
| <b>C20:2n-6</b>       | 11,14-Eicosadienoate                | 322 | 67                  | 81  | 291 | 51.455   |
| <b>C20:1n-9cis</b>    | 11Z-Eicosenoate                     | 324 | 69                  | 74  | 292 | 51.570   |
| <b>C20:0</b>          | Eicosanoate                         | 326 | 74                  | 87  | 283 | 52.150   |
| <b>C21:0</b>          | Heneicosanoate                      | 340 | 74                  | 87  | 297 | 54.245   |
| <b>C22:6n-3</b>       | 4,7,10,13,16,19-Docosahexaenoate    | 350 | 79                  | 91  | 67  | 54.760   |
| <b>C22:2n-6</b>       | 13,16-Docosadienoate                | 350 | 67                  | 55  | 319 | 55.625   |
| <b>C22:0</b>          | Docosanoate                         | 354 | 74                  | 87  | 311 | 56.145   |
| <b>C23:0</b>          | Tricosanoate                        | 368 | 74                  | 87  | 325 | 57.905   |
| <b>C24:1</b>          | 15Z-Tetracosenoate                  | 380 | 55                  | 69  | 306 | 59.180   |
| <b>C24:0</b>          | Tetracosanoate                      | 382 | 74                  | 87  | 339 | 59.550   |

MW: Molecular weight; Rt: Retention time.

**Table S3. The equation and the correlation coefficient of metallic elements in serum and urine.**

| Sample | Metallic element   | Calibration equation | Regression coefficient | Limit of detection |
|--------|--------------------|----------------------|------------------------|--------------------|
| serum  | Na                 | $Y=34.534X-4.1796$   | 0.9995                 | 0.001245           |
|        | Mg                 | $Y=21.993X-1.6588$   | 0.9996                 | 0.000599           |
|        | K                  | $Y=12.954X-1.5939$   | 0.9996                 | 0.001784           |
|        | Ca                 | $Y=0.359X-0.0249$    | 0.9994                 | 0.009145           |
|        | Be                 | $Y=0.0117X+0.0126$   | 0.9993                 | 0.000102           |
|        | B                  | $Y=0.0033X+0.0041$   | 0.9994                 | 0.277655           |
|        | Al                 | $Y=0.0095X+0.0039$   | 0.9999                 | 0.631010           |
|        | V                  | $Y=0.1046X+0.0945$   | 0.9994                 | 0.009036           |
|        | Mn                 | $Y=0.0628X+0.0356$   | 0.9998                 | 0.066127           |
|        | Fe                 | $Y=0.0026X+0.0002$   | 1.0000                 | 0.329695           |
|        | Co                 | $Y=0.2193X+0.0736$   | 1.0000                 | 0.004181           |
|        | Ni                 | $Y=0.0648X+0.0397$   | 0.9997                 | 0.061710           |
|        | Cu                 | $Y=0.4543X+0.6482$   | 0.9992                 | 0.016021           |
|        | Zn                 | $Y=0.0648X+0.0815$   | 0.9991                 | 0.229393           |
|        | Mo                 | $Y=0.0063X+0.0088$   | 0.9992                 | 0.030939           |
|        | Cd                 | $Y=0.0035X+0.0026$   | 0.9997                 | 0.036909           |
| Sb     | $Y=0.0202X+0.0068$ | 1.0000               | 0.007734               |                    |
| Ba     | $Y=0.0058X+0.002$  | 0.9999               | 0.065140               |                    |
| Tl     | $Y=0.062X+0.0877$  | 0.9993               | 0.000212               |                    |
| Pb     | $Y=0.1118X+0.1338$ | 0.9991               | 0.013341               |                    |
| Urine  | Na                 | $Y=59.019X-5.3456$   | 0.9997                 | 0.000441           |
|        | Mg                 | $Y=36.049X-2.5413$   | 0.9998                 | 0.000049           |
|        | K                  | $Y=14.848X-1.5168$   | 0.9995                 | 0.002589           |
|        | Ca                 | $Y=0.3778X-0.0581$   | 0.9991                 | 0.001107           |



|           |                    |        |          |
|-----------|--------------------|--------|----------|
| <b>Be</b> | $Y=0.006X+0.0077$  | 0.9993 | 0.013729 |
| <b>B</b>  | $Y=0.0019X+0.0018$ | 0.9990 | 0.447451 |
| <b>Al</b> | $Y=0.0086X+0.0037$ | 1.0000 | 0.008101 |
| <b>V</b>  | $Y=0.1078X+0.123$  | 0.9976 | 0.009036 |
| <b>Mn</b> | $Y=0.0854X+0.0042$ | 1.0000 | 0.003456 |
| <b>Fe</b> | $Y=0.0028X+0.0045$ | 0.9993 | 0.394351 |
| <b>Co</b> | $Y=0.2535X-0.3931$ | 0.9994 | 0.001551 |
| <b>Ni</b> | $Y=0.0556X+0.0523$ | 0.9992 | 0.007469 |
| <b>Cu</b> | $Y=0.3378X+0.1673$ | 0.9997 | 0.010768 |
| <b>Zn</b> | $Y=0.06X+0.0645$   | 0.9997 | 0.030924 |
| <b>Mo</b> | $Y=0.007X+0.0012$  | 1.0000 | 0.010857 |
| <b>Cd</b> | $Y=0.0045X+0.0028$ | 0.9998 | 0.001090 |
| <b>Sb</b> | $Y=0.019X+0.0003$  | 1.0000 | 0.007734 |
| <b>Ba</b> | $Y=0.0061X-0.0002$ | 1.0000 | 0.007009 |
| <b>Tl</b> | $Y=0.0249X-0.0103$ | 0.9999 | 0.001919 |
| <b>Pb</b> | $Y=0.0407X+0.0014$ | 1.0000 | 0.003407 |

\*X: the concentration of metallic element; Y: relative peak area = peak area of metallic element /peak area of internal standard.

**Table S4. Effect of PB2 on organs relative weights in ADR mice.**

|             | Groups | Body weight  | liver          | kidney        |
|-------------|--------|--------------|----------------|---------------|
| second week | NC     | 41.5±1.02    | 5.410±0.37     | 1.487±0.25    |
|             | ADR    | 35.9±4.20*** | 6.144±0.105*** | 1.954±0.20**  |
|             | SIR    | 39.5±3.75### | 5.921±0.11     | 1.786±0.21    |
|             | PB2H   | 36.4±2.47    | 5.436±0.20###  | 1.611±0.01#   |
|             | PB2L   | 38.4±3.34#   | 5.541±0.09###  | 1.653±0.02    |
| fourth week | NC     | 44.58±0.36   | 5.463±0.05     | 1.488±0.01    |
|             | ADR    | 34.4±2.53*** | 6.180±0.10***  | 2.223±0.03*** |
|             | SIR    | 42.9±3.26### | 5.953±0.04###  | 1.821±0.02### |
|             | PB2H   | 39.0±3.93##  | 5.623±0.07###  | 1.592±0.02### |
|             | PB2L   | 42.3±3.22### | 5.545±0.06###  | 1.671±0.01### |
| fifth week  | NC     | 46.9±0.41    | 5.463±0.04     | 1.483±0.01    |
|             | ADR    | 31.5±0.83*** | 6.199±0.04***  | 2.468±0.03*** |
|             | SIR    | 38.1±1.25### | 5.957±0.02###  | 1.842±0.03### |
|             | PB2H   | 36.5±2.49### | 5.616±0.03###  | 1.615±0.02### |
|             | PB2L   | 35.0±3.45### | 5.509±0.06###  | 1.670±0.01### |

Values are presented as the mean ± SEM (n=8). Data analyzed by one-factor analysis of variance (ANOVA) followed by a Tukey's post hoc test.

\* $P < 0.05$ , \*\* $P < 0.01$ , \*\*\* $P < 0.001$  vs NC; # $P < 0.05$ , ## $P < 0.01$ , ### $P < 0.001$  vs ADR.

**Table S5. Effect of PB2 on renal function in serum of ADR mice.**

|             | Groups       | NC          | ADR            | SIR           | PB2H          | PB2L          |
|-------------|--------------|-------------|----------------|---------------|---------------|---------------|
| second week | ALB (g/L)    | 6.78±1.23   | 3.21±0.21***   | 5.6±0.19###   | 4.25±0.04#    | 3.85±0.09     |
|             | TP (mg/mL)   | 80.4±4.59   | 61.11±1.65***  | 69.64±1.56##  | 72.37±0.74### | 64.45±1.07    |
|             | Cr (μmol/L)  | 27.43±1.81  | 35.79±2.18***  | 28.25±2.12### | 22.84±1.39### | 31.68±1.75#   |
|             | BUN (mmol/L) | 53.84±1.67  | 92.42±3.21***  | 83.7±1.3##    | 76.4±3.33###  | 83.91±3.66##  |
|             | UA (μmol/L)  | 41.79±2.23  | 56.26±2.1***   | 49.32±1.14#   | 52.2±1.55     | 55.08±0.69    |
|             | Cys-c (μg/L) | 710.5±98.47 | 747.5±52.35    | 711.9±52.19   | 701.0±53.39   | 729.7±38.55   |
| fourth week | ALB (g/L)    | 5.68±0.39   | 3.33±0.2***    | 4.68±0.13###  | 4.27±0.07###  | 4.23±0.04###  |
|             | TP (mg/mL)   | 82.4±2.13   | 55.26±1.88***  | 74.42±1.88### | 75.29±1.61### | 67.03±1.63### |
|             | Cr (μmol/L)  | 28.62±1.52  | 38.17±2.68***  | 30.27±2.52### | 24.46±2.04### | 32.78±1.88#   |
|             | BUN (mmol/L) | 53.24±2.11  | 108.25±2.52*** | 72.74±2.62### | 61.44±2.15### | 70.75±1.64### |
|             | UA (μmol/L)  | 50.42±3.73  | 134.52±4.74*** | 81.27±5.64### | 104.25±3.79## | 115.4±2.74#   |
|             | Cys-c (μg/L) | 734.4±81.42 | 713.2±88.06    | 805.3±121.2   | 635.4±94.08   | 748.1±55.64   |

The serum levels of ALB, TP, Cr, BUN, and UA were detected by relevant assay kits; the serum levels of Cys-c were measured by ELISA kit.

Values are presented as the mean ± SEM (n=8). Data analyzed by one-factor analysis of variance (ANOVA) followed by a Tukey's post hoc test.

\* $P < 0.05$ , \*\* $P < 0.01$ , \*\*\* $P < 0.001$  vs NC; # $P < 0.05$ , ## $P < 0.01$ , ### $P < 0.001$  vs ADR.

**Table S6. Effects of PB2 on serum SOD, NO, iNOS, ROS, MDA, GSH, CAT and GPx in ADR mice (fifth week).**

| Groups        | NC           | ADR             | SIR             | PB2H            | PB2L            |
|---------------|--------------|-----------------|-----------------|-----------------|-----------------|
| T-SOD (U/mL)  | 292.29±9.4   | 194.49±7.13***  | 267.22±8.1###   | 256.07±10.95### | 234.94±6.49###  |
| NO (ng/mL)    | 35.54±4.74   | 72.42±1.64***   | 56.13±2.68###   | 45.18±3.05###   | 60.36±1.64###   |
| iNOS (μmol/L) | 11.84±1.07   | 19.62±1.3***    | 13.86±1.3###    | 12.3±1.07###    | 14.58±0.9###    |
| ROS (nmol/mL) | 692.39±59.34 | 862.86±91.32*** | 718.56±90.88### | 758.33±88.32### | 826.14±73.93### |
| MDA (nmol/mL) | 3.62±0.07    | 6.54±0.48***    | 3.64±0.27###    | 4.01±0.15###    | 5.42±0.1###     |
| GSH (μmol/L)  | 98.10±13.93  | 30.73±4.93***   | 69.30±9.32###   | 78.32±12.34###  | 57.39±7.00###   |
| CAT (U/mL)    | 31.89±3.48   | 21.04±1.73***   | 27.5±1.59##     | 25.77±1.14#     | 23.39±2.81      |
| GPx (mU/ml)   | 226.07±3.89  | 124.44±3.74***  | 194.36±8.29###  | 209.28±5.47###  | 195.41±5.91###  |

The activities of T-SOD, CAT, and Gpx in the serum were assessed by relevant activity assay kits; the productions of MDA and NO in the serum were detected by commercial assay kits; the concentrations of iNOS, GSH, and ROS were measured by ELISA kits. Values are presented as the mean ± SEM (n=8). Data analyzed by one-factor analysis of variance (ANOVA) followed by a Tukey's post hoc test. \**P* < 0.05, \*\**P* < 0.01, \*\*\**P* < 0.001 vs NC; #*P* < 0.05, ##*P* < 0.01, ###*P* < 0.001 vs ADR.

**Table S7. Effects of PB2 on serum TNF- $\alpha$ , NF- $\kappa$ B, IL-1 $\beta$ , IFN $\gamma$ , IL-6, IL-17, MCP-1 and IL-5, Hsp90 in ADR mice (fifth week)**

| Groups                | NC                 | ADR                   | SIR                   | PB2H                  | PB2L                 |
|-----------------------|--------------------|-----------------------|-----------------------|-----------------------|----------------------|
| TNF- $\alpha$ (ng/L)  | 573.63 $\pm$ 9.61  | 697.75 $\pm$ 15.4***  | 628.79 $\pm$ 10.95##  | 614.63 $\pm$ 14.96### | 637.84 $\pm$ 13.17## |
| NF- $\kappa$ B (ng/L) | 348.28 $\pm$ 16.59 | 745.38 $\pm$ 29.06*** | 635.62 $\pm$ 22.25### | 607.47 $\pm$ 14.05### | 613 $\pm$ 28.74###   |
| IL-1 $\beta$ (ng/L)   | 28.5 $\pm$ 2.47    | 57.13 $\pm$ 2.95***   | 43.22 $\pm$ 4.36###   | 47.06 $\pm$ 3.67##    | 50.14 $\pm$ 3.29#    |
| IFN $\gamma$ (ng/L)   | 982.77 $\pm$ 44.81 | 554.58 $\pm$ 28.25*** | 697.99 $\pm$ 24.57### | 715.07 $\pm$ 26.16### | 706.78 $\pm$ 14.4### |
| IL-6 (pg/mL)          | 5.06 $\pm$ 1.16    | 15.57 $\pm$ 2.88***   | 11.43 $\pm$ 2.09###   | 9.37 $\pm$ 1.27###    | 11.59 $\pm$ 1.61###  |
| IL-17 (ng/L)          | 3.57 $\pm$ 0.44    | 6.67 $\pm$ 0.83***    | 5.85 $\pm$ 0.63###    | 4.87 $\pm$ 0.57###    | 5.59 $\pm$ 0.49###   |
| MCP-1 (pg/mL)         | 95.62 $\pm$ 6.67   | 163.3 $\pm$ 20.01***  | 117.3 $\pm$ 5.67##    | 109.8 $\pm$ 4.66###   | 159.6 $\pm$ 13.96    |
| IL-5 (pg/ml)          | 2.43 $\pm$ 0.16    | 14.17 $\pm$ 2.05***   | 9.29 $\pm$ 2.67##     | 6.34 $\pm$ 0.83###    | 10.97 $\pm$ 1.21#    |
| Hsp90 (g/ml)          | 32.43 $\pm$ 0.36   | 52.66 $\pm$ 0.16**    | 35.98 $\pm$ 0.27###   | 32.01 $\pm$ 0.21#     | 21.77 $\pm$ 0.24##   |

The levels of TNF- $\alpha$ , NF- $\kappa$ B, IL-1 $\beta$ , IFN $\gamma$ , IL-6, IL-17, MCP-1, IL-5, and Hsp90 in the serum were assessed by ELISA kits. Values are presented as the mean  $\pm$  SEM (n=8). Data analyzed by one-factor analysis of variance (ANOVA) followed by a Tukey's post hoc test. \* $P$  < 0.05, \*\* $P$  < 0.01, \*\*\* $P$  < 0.001 vs NC; # $P$  < 0.05, ## $P$  < 0.01, ### $P$  < 0.001 vs ADR.

**Table S8. Effect of PB2 on liver function in ADR mice**

|       | Groups                  | NC         | ADR           | SIR           | PB2H          | PB2L         |
|-------|-------------------------|------------|---------------|---------------|---------------|--------------|
| Serum | ALT (U/L)               | 8.34±0.47  | 20.71±2.68*** | 15.13±0.27### | 14.62±0.69### | 16.54±0.59## |
|       | AST (U/L)               | 23.53±1.99 | 41.79±5.8**   | 31.61±4.34    | 28.85±6.59#   | 33.98±4.92   |
|       | ALP (U/L)               | 8.77±0.33  | 19.22±0.15*** | 12.99±1.20##  | 11.87±0.99##  | 13.76±0.55#  |
|       | TBILL ( μ mol/L)        | 2.77±0.73  | 9.56±1.26***  | 6.99±0.26###  | 6.37±0.77###  | 9.02±1.87#   |
|       | DBIL ( μ mol/L)         | 1.66±0.36  | 6.33±0.11***  | 4.62±0.64#    | 3.98±0.27##   | 5.20±0.65    |
| Liver | ALT (U/ mg prot)        | 10.76±0.76 | 23.92±2.47*** | 16.58±1.61### | 12.04±1.09### | 18.38±1.35## |
|       | AST (U/ mg prot)        | 7.14±1.39  | 13.48±3.25**  | 8.6±2.13#     | 7.82±1.29#    | 11.13±2.83   |
|       | ALP (U/ mg prot)        | 8.87±0.23  | 19.43±0.71**  | 12.99±0.62#   | 9.32±0.09###  | 14.98±0.23#  |
|       | TBILL ( μ mol/ mg prot) | 5.55±0.36  | 3.32±0.27**   | 4.67±0.37     | 4.66±0.28#    | 4.52±0.19##  |
|       | DBIL ( μ mol/ mg prot)  | 2.65±0.15  | 1.01±0.04*    | 2.12±0.06#    | 2.28±0.11#    | 1.87±0.21#   |

The activities of ALT, AST, and ALP in the serum and liver, were evaluated by relevant activity assay kits; the levels of TBIL and DBIL in the serum and liver, were measured by ELISA kits. Values are presented as the mean ± SEM (n=8). Data analyzed by one-factor analysis of variance (ANOVA) followed by a Tukey's post hoc test. \* $P < 0.05$ , \*\* $P < 0.01$ , \*\*\* $P < 0.001$  vs NC; # $P < 0.05$ , ## $P < 0.01$ , ### $P < 0.001$  vs ADR.

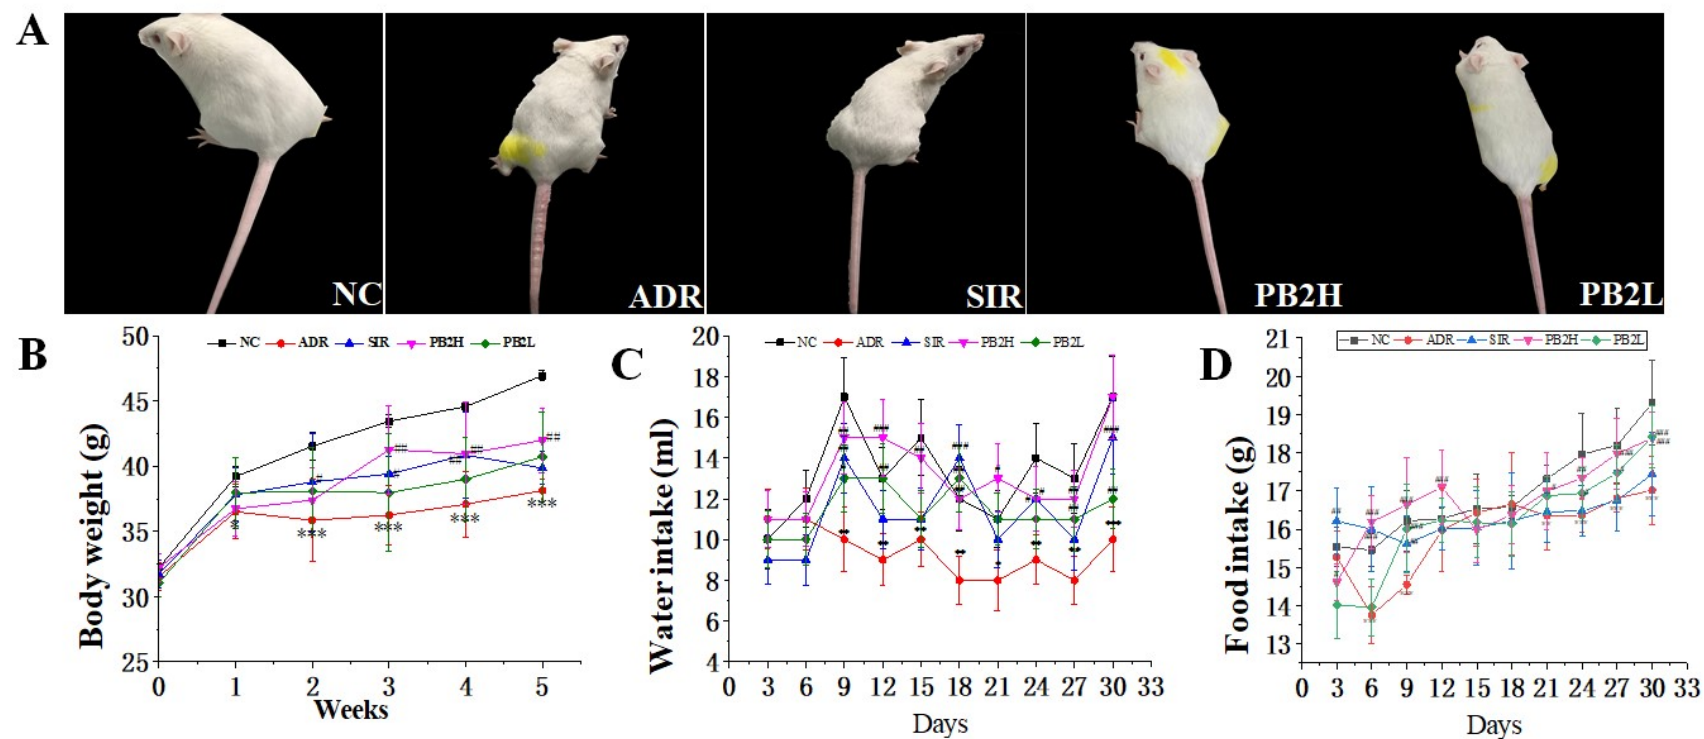

**Figure S1. Effects of PB2 on general conditions of ADR-induced NS mice.** Macroscopic observations of all groups (A); Body weight (B); water intake (C); food intake (D). Values are presented as the mean  $\pm$  SEM (n=8). Data analyzed by one-factor analysis of variance (ANOVA) followed by a Tukey's post hoc test. \* $P < 0.05$ , \*\* $P < 0.01$ , \*\*\* $P < 0.001$  vs NC; # $P < 0.05$ , ## $P < 0.01$ , ### $P < 0.001$  vs ADR.

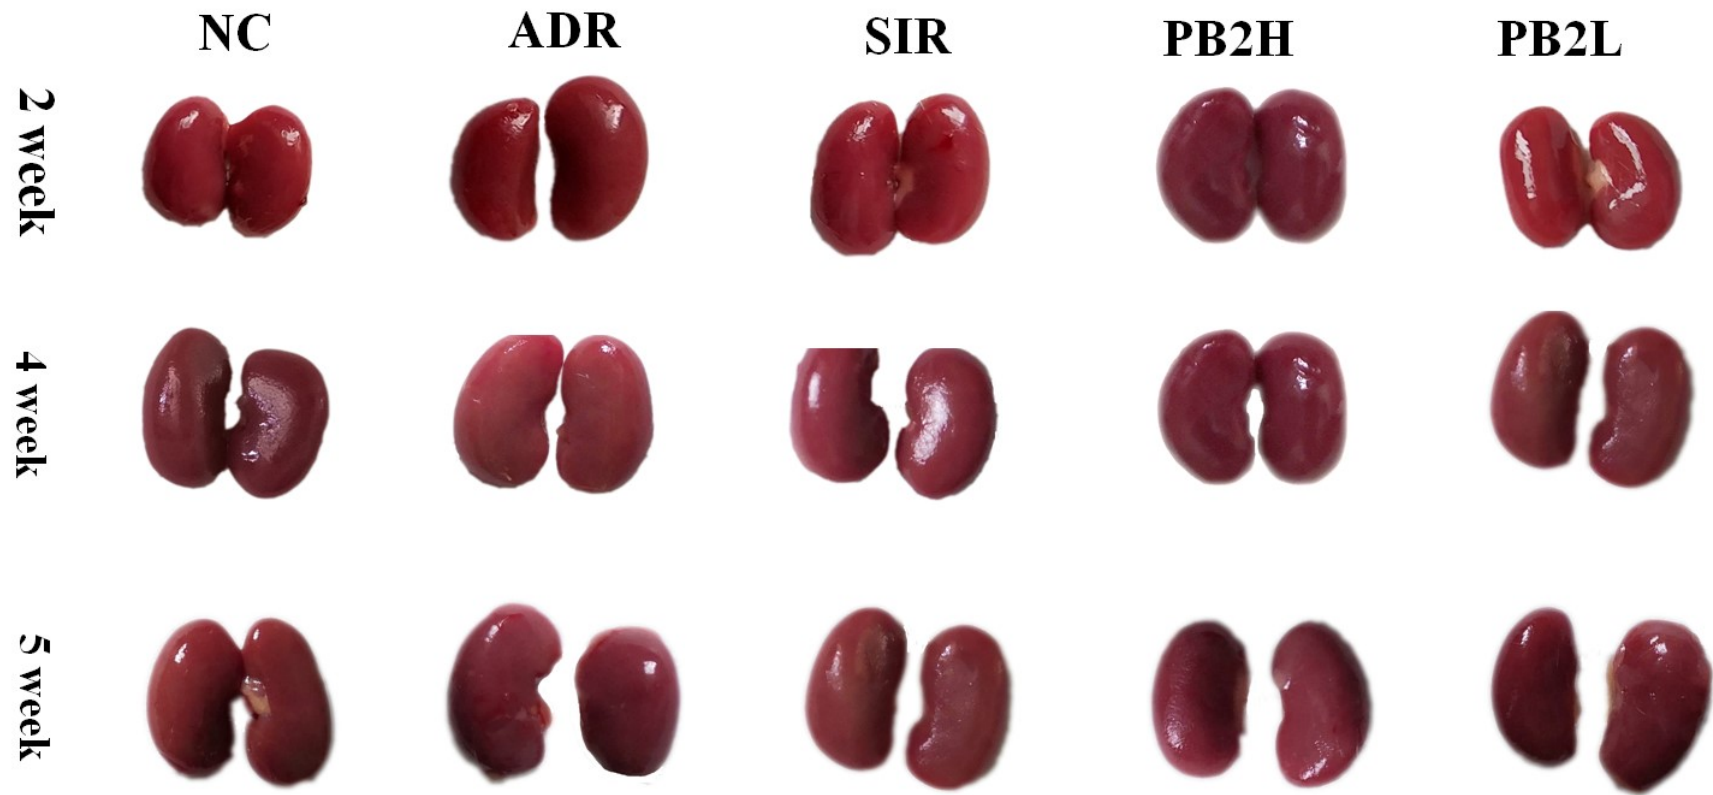

Figure S2. The general observation of kidney in each group at different periods. Values are presented as the mean  $\pm$  SEM (n=8). Data



analyzed by one-factor analysis of variance (ANOVA) followed by a Tukey's post hoc test. \* $P < 0.05$ , \*\* $P < 0.01$ , \*\*\* $P < 0.001$  vs NC; # $P < 0.05$ , ## $P < 0.01$ , ### $P < 0.001$  vs ADR.

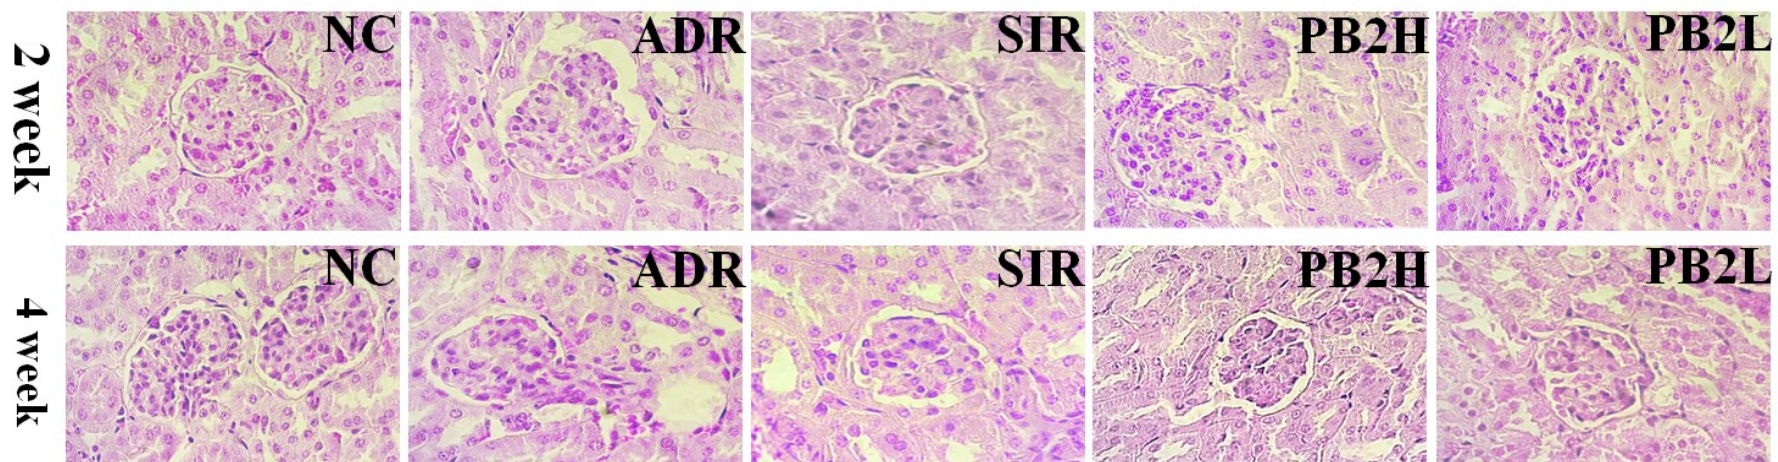

**Figure S3.** The kidney sections were stained with haematoxylin and eosin (H&E) to demonstrate the histopathological morphology at **2 and 4 weeks**. Values are presented as the mean  $\pm$  SEM (n=8). Data analyzed by one-factor analysis of variance (ANOVA) followed by a Tukey's post hoc test. \* $P < 0.05$ , \*\* $P < 0.01$ , \*\*\* $P < 0.001$  vs NC; # $P < 0.05$ , ## $P < 0.01$ , ### $P < 0.001$  vs ADR.

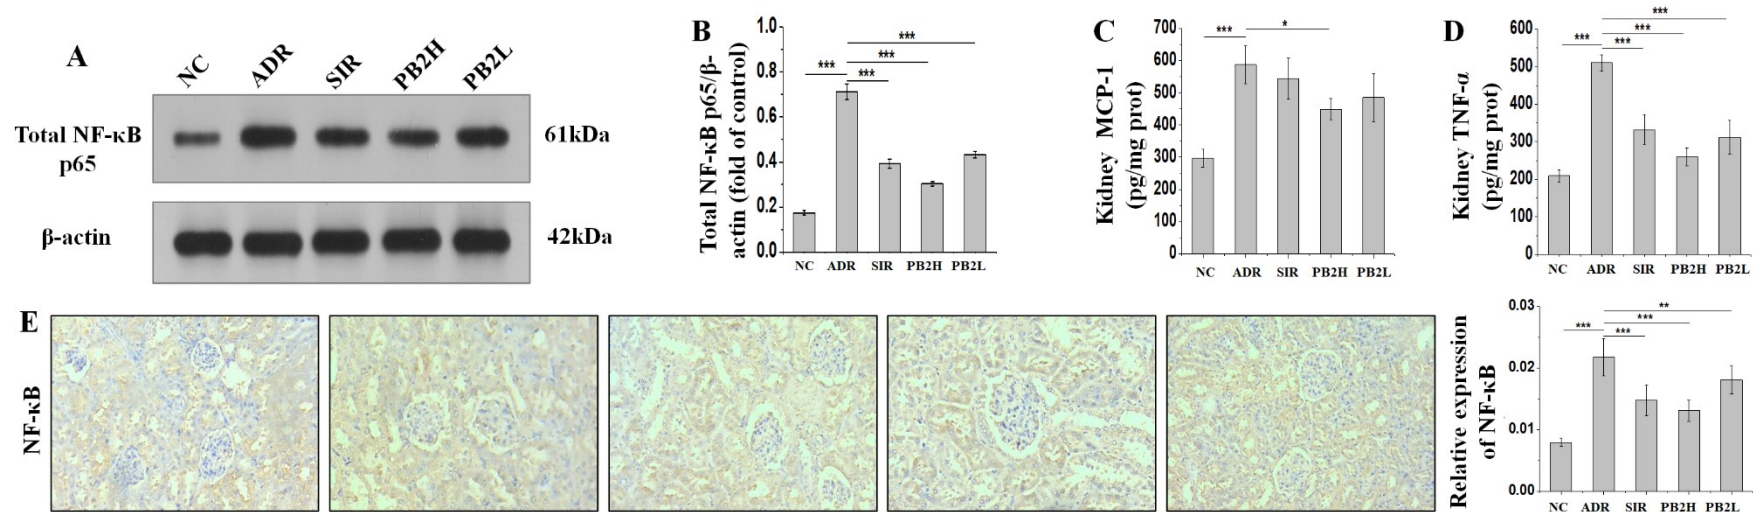

**Figure S4. The effects of PB2 on renal inflammation.** (A) Representative immunoblot for detection of total NF-κB p65; (B) Fold change in relative density of total NF-κB p65 protein bands. The relative density is presented as total NF-κB p65/β-actin; (C, D) The levels of MCP-1 and TNF-α in the kidney; (E) The immunohistochemical analyses and its quantifications of NF-κB in the kidney. The levels of total NF-κB P65 in the kidney were detected by Western blotting; the levels of MCP-1 and TNF-α in the kidney were measured using ELISA kits. Values are presented as the mean ± SEM (n=8). Data analyzed by one-factor analysis of variance (ANOVA) followed by a Tukey's post hoc test. \* $P < 0.05$ , \*\* $P < 0.01$ , \*\*\* $P < 0.001$  vs NC; # $P < 0.05$ , ## $P < 0.01$ , ### $P < 0.001$  vs ADR.

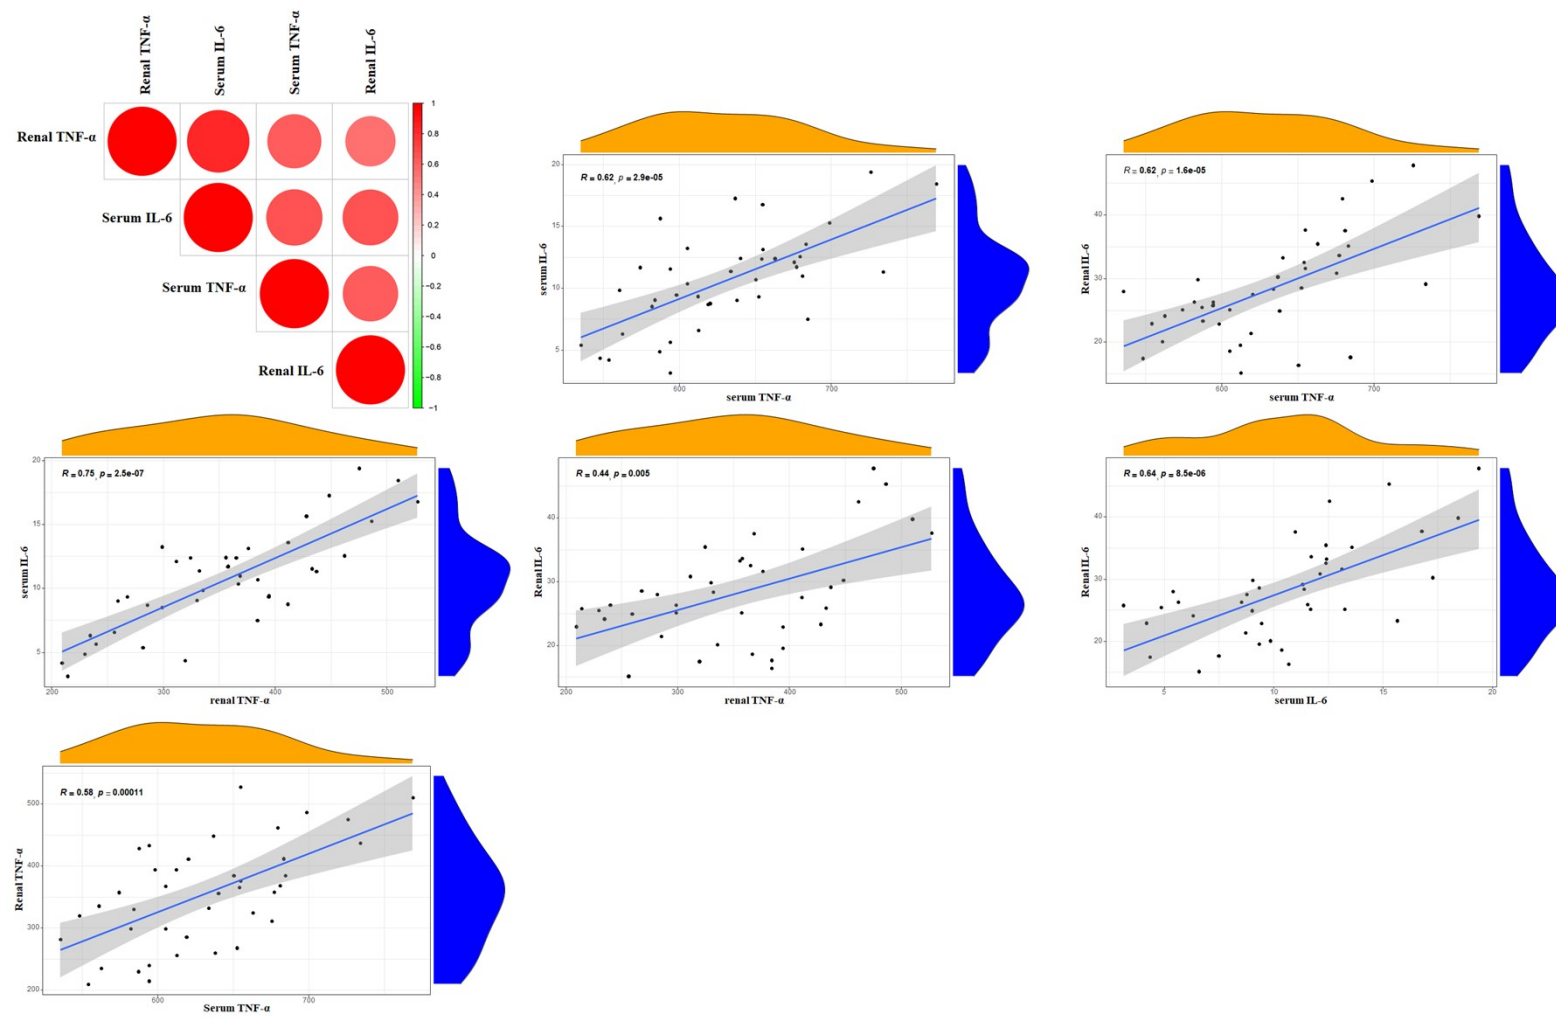

Figure S5. The statistical study of correlation between serum and renal levels of TNF- $\alpha$  and IL-6.

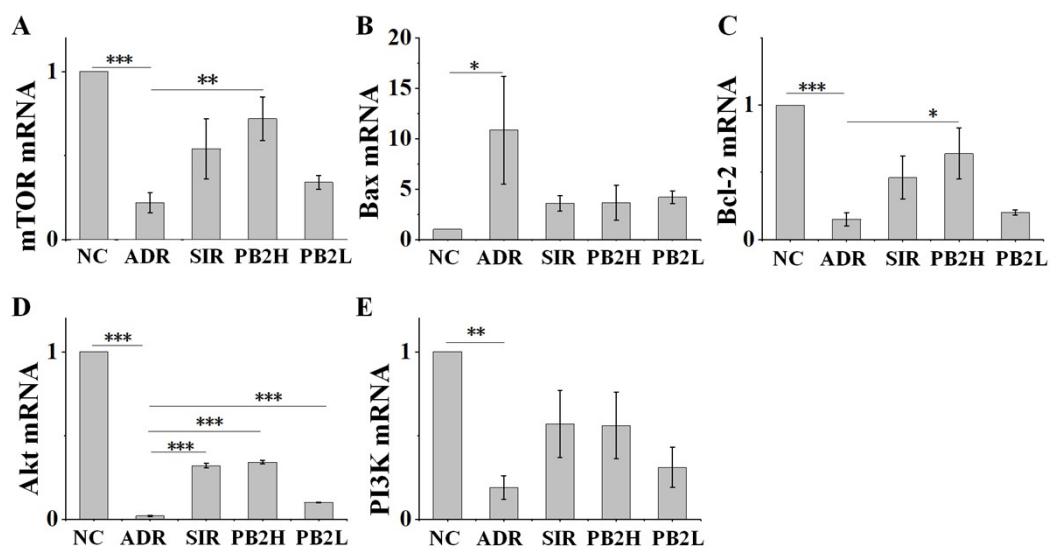

**Figure S6. The mRNA expressions of mTOR(A), Bax(B), Bcl-2(C), Akt(D) and PI3K(E) in kidney were evaluated by qRT-PCR analysis.** Values are presented as the mean  $\pm$  SEM (n=8). Data analyzed by one-factor analysis of variance (ANOVA) followed by a Tukey's post hoc test. \* $P < 0.05$ , \*\* $P < 0.01$ , \*\*\* $P < 0.001$  vs NC; # $P < 0.05$ , ## $P < 0.01$ , ### $P < 0.001$  vs ADR.

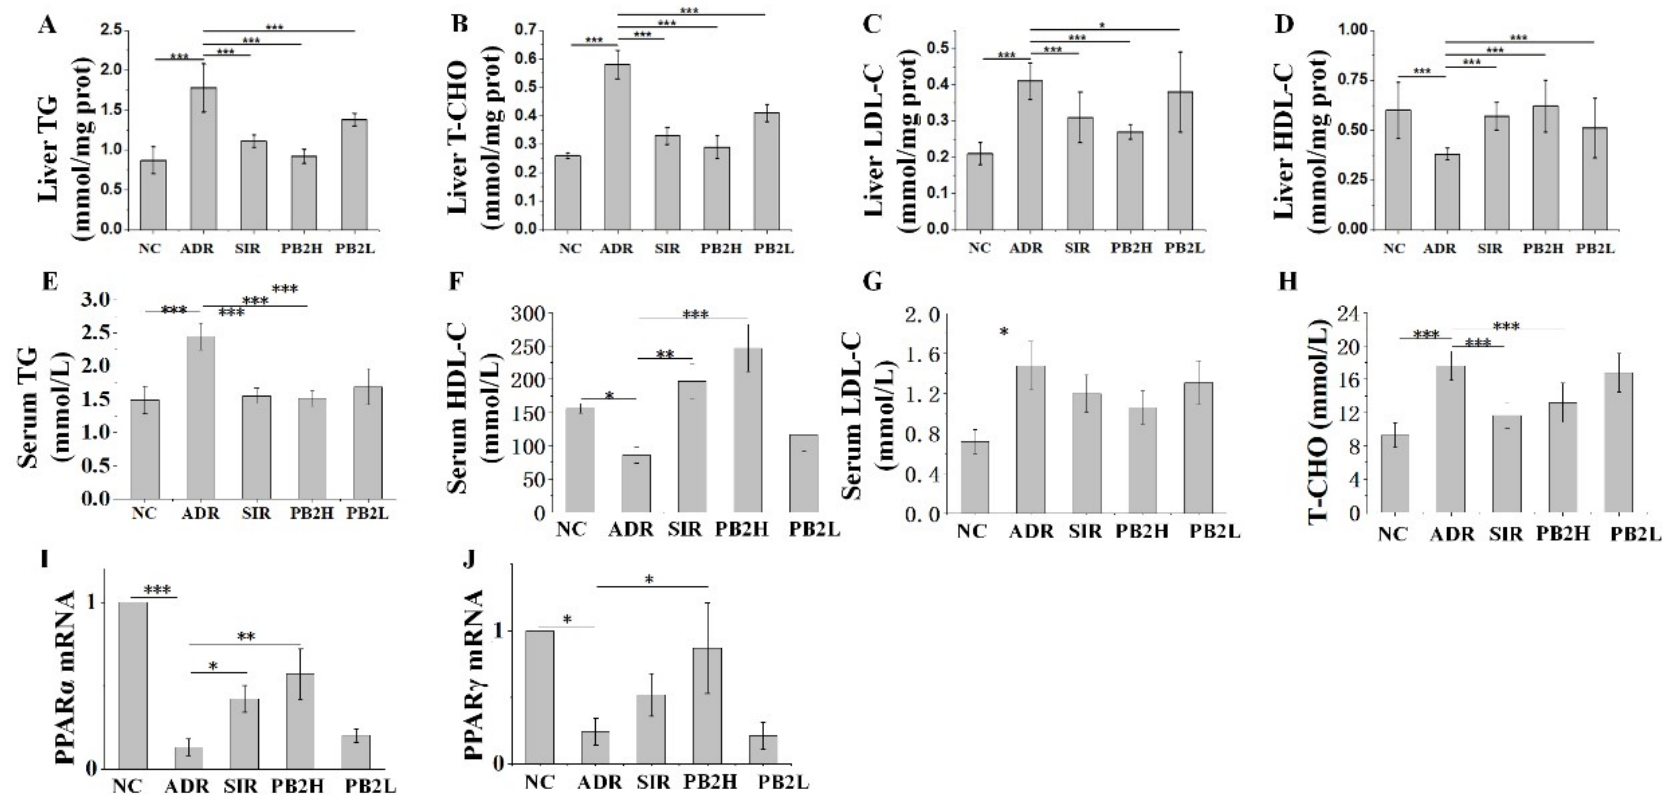

**Figure S7. Effects of PB2 on lipid dysmetabolism.** (A-D) The levels of TG, T-CHO, LDL-C, HDL-L in liver; (E-H) The levels of TG, T-CHO, LDL-C, HDL-L in serum; (I-J) The mRNA expressions of PPAR $\alpha$  and PPAR $\gamma$  in the kidney. The levels of T-CHO, TG, LDL-C, and HDL-C in the liver and serum, were detected by assay kits; the mRNA expressions of PPAR $\alpha$  and PPAR $\gamma$  in the kidney were evaluated by qRT-PCR analysis. Values are presented as the mean  $\pm$  SEM (n=8). Data analyzed by one-factor analysis of variance (ANOVA) followed by a Tukey's post hoc test. \* $P < 0.05$ , \*\* $P < 0.01$ , \*\*\* $P < 0.001$  vs NC; # $P < 0.05$ , ## $P < 0.01$ , ### $P < 0.001$  vs ADR.



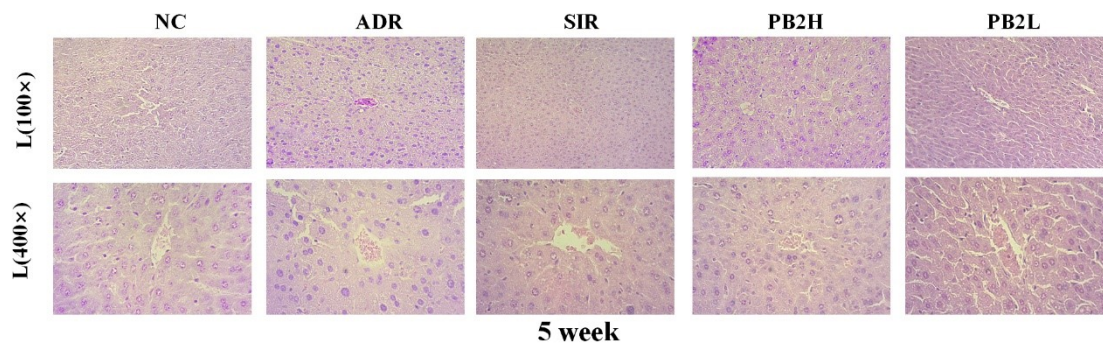

**Figure S8. The liver sections were stained with haematoxylin and eosin (H&E) to demonstrate the histopathological morphology (100×, 400×) at fifth week; Liver sections stained with H&E (B). Values are presented as the mean ± SEM (n=8). Data analyzed by one-factor analysis of variance (ANOVA) followed by a Tukey's post hoc test. \* $P < 0.05$ , \*\* $P < 0.01$ , \*\*\* $P < 0.001$  vs NC; # $P < 0.05$ , ## $P < 0.01$ , ### $P < 0.001$  vs ADR.**

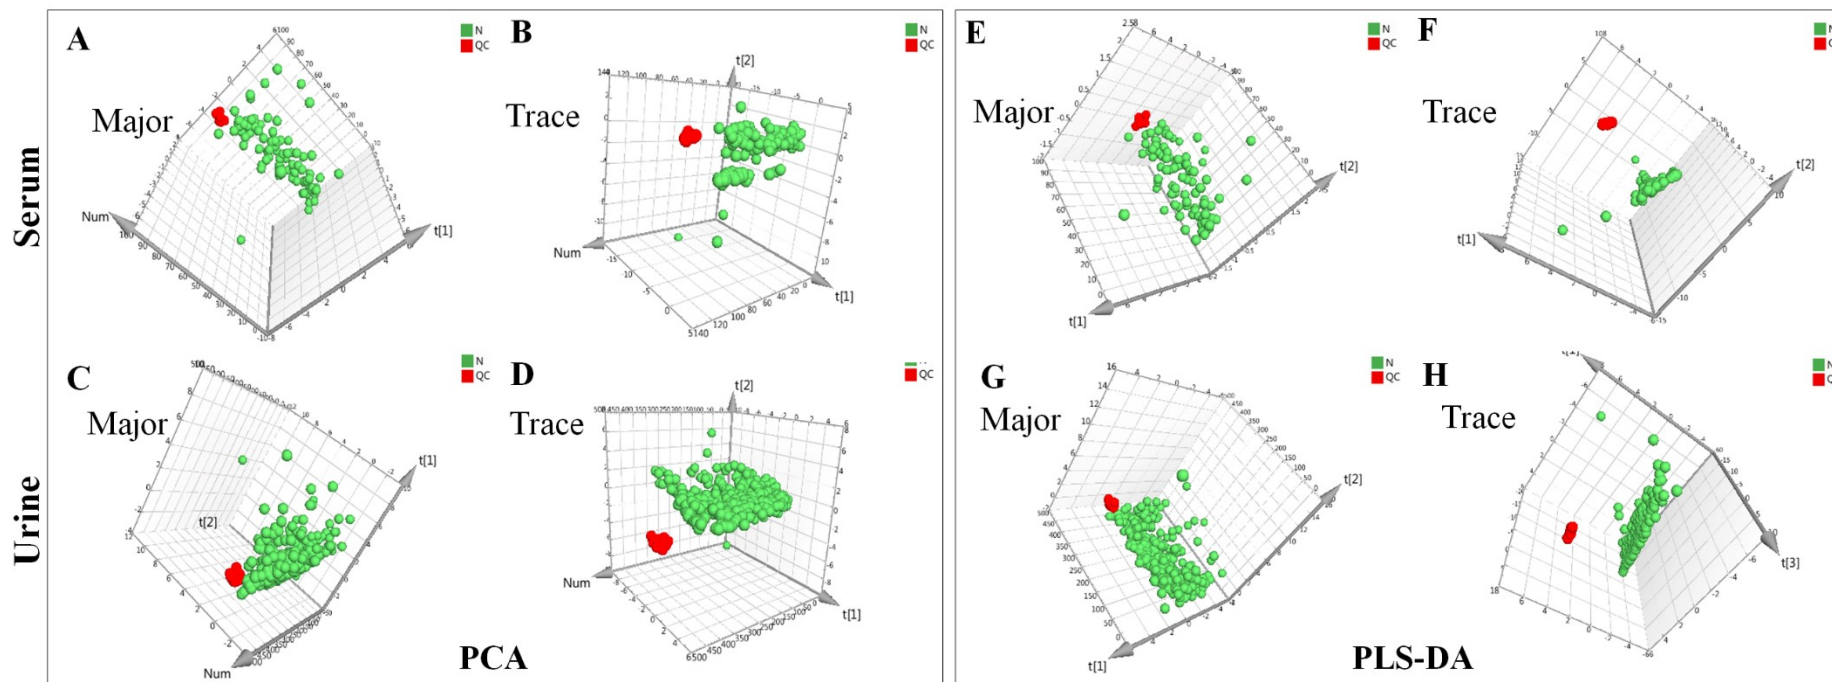

**Figure S9. The QC of PCA and PLS-DA.** (A-D) PCA score plots: (A) serum major elements, (B) serum trace elements, (C) urine major elements and (D) urine trace elements. (E-H) PLS-DA score plots: (E) serum major elements, (F) serum trace elements, (G) urine major elements and (H) urine trace elements.

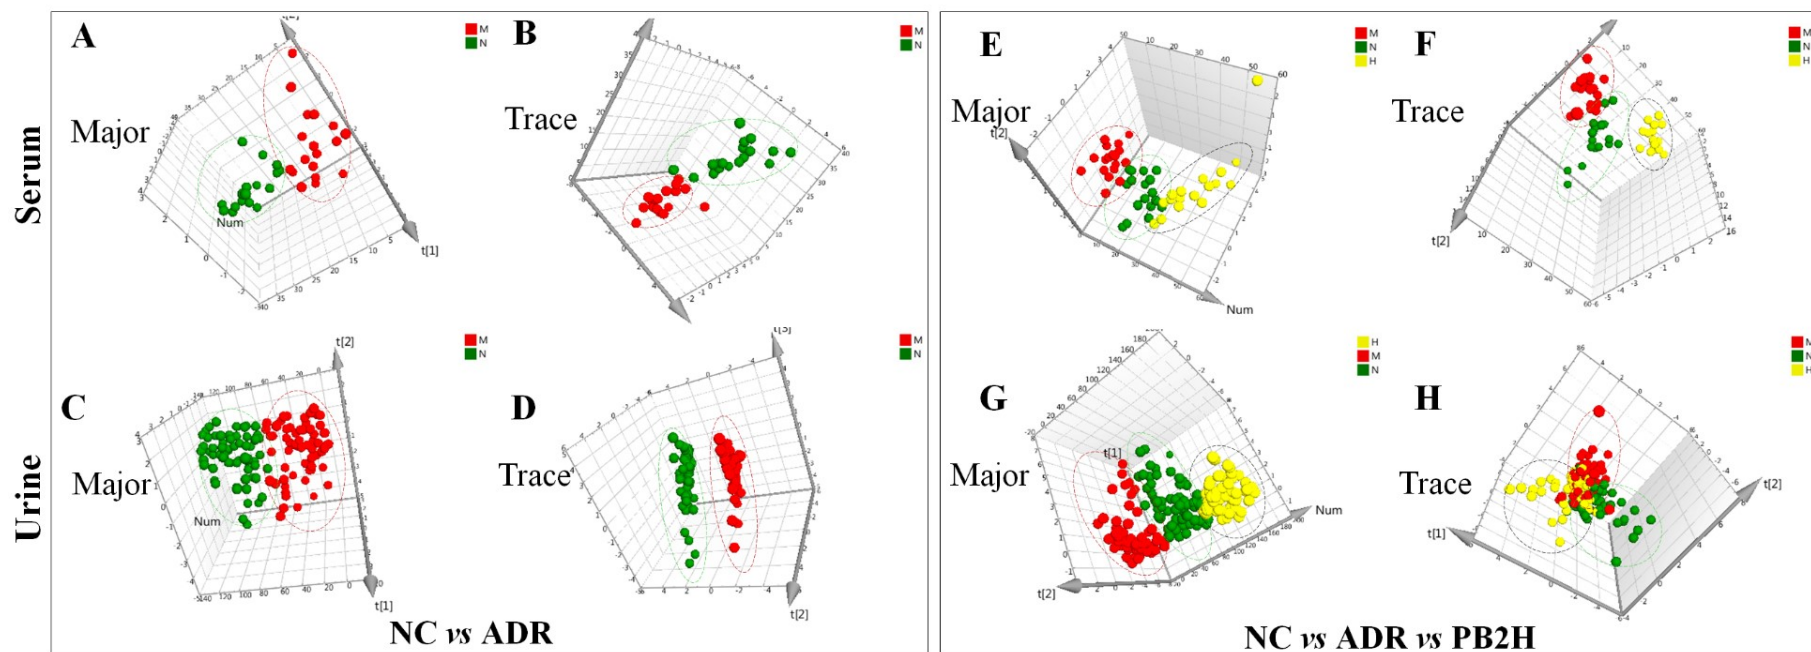

**Figure S10. PLS-DA score plots model of elements derived from the serum and urine of mice.** (A) serum major element from the NC group and ADR group; (B) serum trace element from the NC group and ADR group; (C) urine major element from the NC group and ADR group; (D) urine trace element from the NC group and ADR group; (E) serum major element from the NC group, ADR group and PB2H group; (F) serum trace element from the NC group, ADR group and PB2H group; (G) urine major element from the NC group, ADR group and PB2H group; (H) urine trace element from the NC group, ADR group and PB2H group.



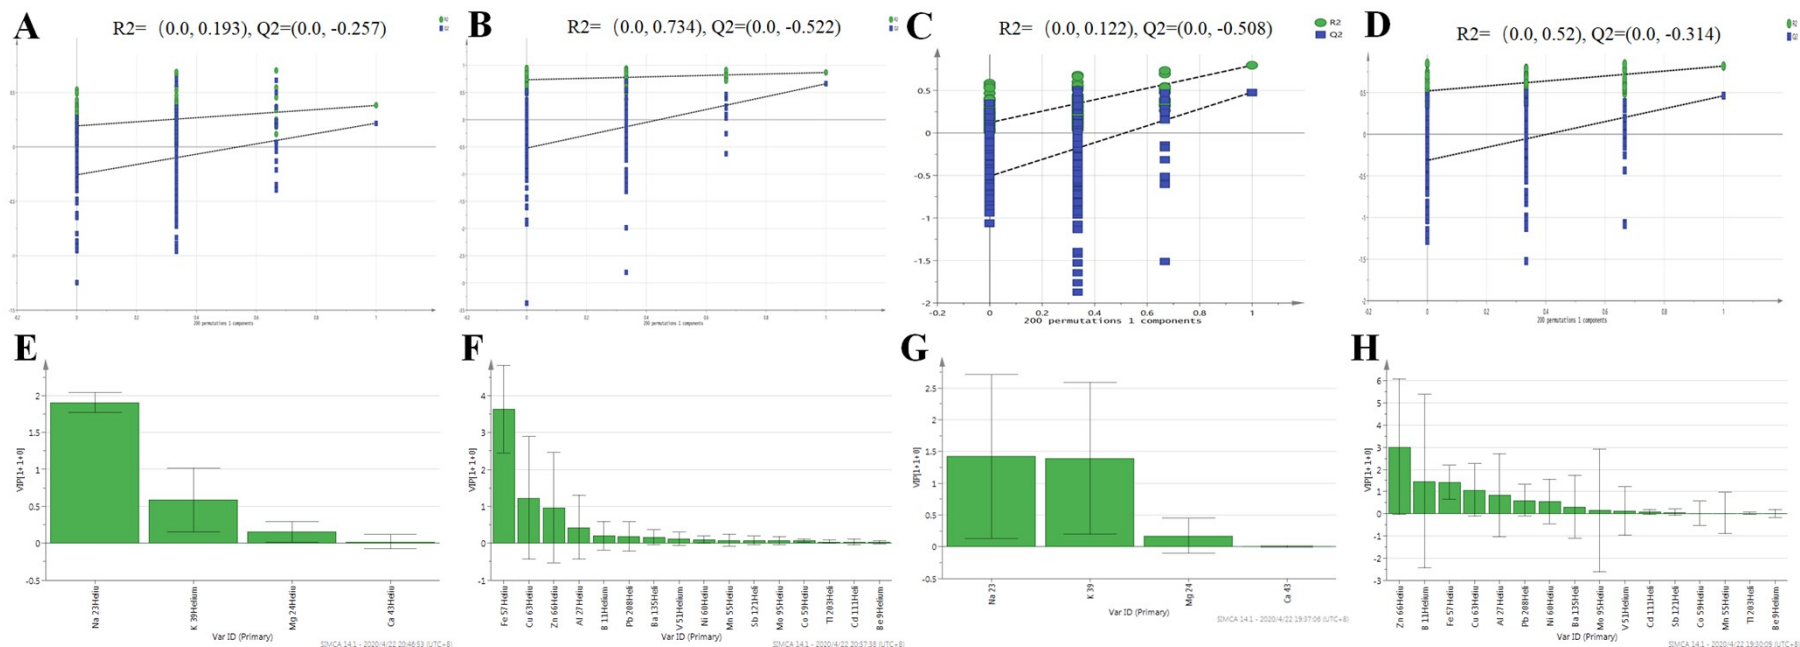

**Figure S11. The result on permutation test of OPLS-DA model and VIP plot of NC group vs ADR group.** (A-D) The result on permutation test of OPLS-DA model in the (A) serum major elements  $R^2(0.0, 0.193)$ ,  $Q^2(0.0, -0.257)$ , (B) serum trace elements  $R^2(0.0, 0.734)$ ,  $Q^2(0.0, -0.522)$ , (C) urine major elements  $R^2(0.0, 0.122)$ ,  $Q^2(0.0, -0.508)$  and (D) urine trace elements  $R^2(0.0, 0.52)$ ,  $Q^2(0.0, -0.314)$  from the ICP-MS spectra of NC and ADR at the 5 weeks. (E-H) VIP plot of NC vs ADR in the (E) serum major elements, (F) serum trace elements, (G) urine major elements and (H) urine trace elements at the 5 weeks
